1  
2  
3  
4  
5  
6  
7  
8  
9  
10  
11  
12  
13  
14  
15  
16  
17  
18  
19  
20  
21  
22  
23  
24  
25  
26  
27

## Original Article

# Development and evaluation of a new methodology for Soft Tissue Artifact compensation in the lower limb

## AUTHORS

Bhriku K. Lahkar<sup>1,\*</sup>, Pierre-Yves Rohan<sup>1</sup>, Ayman Assi<sup>1,2</sup>, Helene Pillet<sup>1</sup>, Xavier Bonnet<sup>1</sup>, Patricia Thoreux<sup>1,3</sup>, Wafa Skalli<sup>1</sup>

## AFFILIATIONS

<sup>1</sup> *Institut de Biomécanique Humaine Georges Charpak, Arts et Métiers Sciences et Technologies, Paris, France*

<sup>2</sup> *Laboratory of Biomechanics and Medical Imaging, Faculty of Medicine, University of Saint-Joseph, Beirut, Lebanon*

<sup>3</sup> *Université Sorbonne Paris Nord, Bobigny, France*

\*Corresponding author: Bhriku K. Lahkar

*Institut de Biomécanique Humaine Georges Charpak, Arts et Métiers ParisTech, 151 Boulevard de l'Hôpital, 75013 Paris, France*

E-mail address: [bhriku\\_kumar.lahkar@ensam.eu](mailto:bhriku_kumar.lahkar@ensam.eu)

28 **Abstract**

29 Skin Marker (SM) based motion capture is the most widespread technique used for motion  
30 analysis. Yet, the accuracy is often hindered by Soft Tissue Artifact (STA). This is a major  
31 issue in clinical gait analysis where kinematic results are used for decision-making. It also  
32 has a considerable influence on the results of rigid body and Finite Element (FE)  
33 musculoskeletal models that rely on SM-based kinematics to estimate muscle, contact and  
34 ligament forces. Current techniques designed to compensate for STA, in particular multi-  
35 body optimization methods, assume anatomical simplifications to define joint constraints.  
36 These methods, however, cannot adapt to subjects' bone morphology, particularly for patients  
37 with joint lesions, nor easily can account for subject- and location-dependent STA. In this  
38 perspective, we propose to develop a conceptual FE based model of the lower limb for STA  
39 compensation and evaluate it for 66 healthy subjects under level walking motor task.

40 Both hip and knee joint kinematics were analyzed, considering both rotational and  
41 translational joint motion. Results showed that STA caused underestimation of the hip joint  
42 kinematics (up to 2.2°) for all rotational DoF, and overestimation of knee joint kinematics (up  
43 to 12°) except in flexion/extension. Joint kinematics, in particular the knee joint, appeared to  
44 be sensitive to soft tissue stiffness parameters (rotational and translational mean difference up  
45 to 1.5° and 3.4 mm). Analysis of the results using alternative joint representations highlighted  
46 the versatility of the proposed modeling approach. This work paves the way for using  
47 personalized models to compensate for STA in healthy subjects and different activities.

48 **Keywords**

49 Soft Tissue Artifact, *In vivo* joint kinematics, Model personalization, Hip and knee joint,  
50 Finite Element Analysis

51

52

## 53 **1. Introduction**

54 Accurate assessment of *in vivo* kinematics is essential for providing insights into normal joint  
55 functionality (Akbarshahi et al., 2010) and investigation of lower limb joint pathology  
56 (Andriacchi and Alexander, 2000). Skin Marker (SM) based motion capture is the most  
57 widespread technique used for estimating skeletal kinematics of the lower limb. However, the  
58 accuracy of such technique is affected by the relative movement of soft tissues with respect to  
59 the underlying bone; a bias commonly referred to as Soft Tissue Artifact (STA). If not  
60 compensated for, STA can lead average kinematic errors up to 16 mm in translation and 13°  
61 in rotation for the knee joint (Benoit et al., 2006). Such errors may significantly influence the  
62 assessment of pathology or the treatment effects in clinical gait analysis (Seffinger and  
63 Hruby, 2007).

64 Different methods have been proposed in the literature to reduce the effect of STA on  
65 bone pose estimation (e.g., single-body optimization (Chèze et al., 1995), double anatomical  
66 landmark calibration (Cappello et al., 1997), point cluster technique (Andriacchi et al., 1998),  
67 and Multi-body Optimisation (MBO) (Lu and O'Connor, 1999)). Amongst these, MBO,  
68 which relies on a predefined kinematic model with specific joint constraints, is increasingly  
69 used. Initially, simple kinematic constraints such as hinge or spherical joints were  
70 considered to represent hip and knee articulation (Charlton et al., 2004; Leardini et al., 2017;  
71 Lu and O'Connor, 1999; Reinbolt et al., 2005). Later, anatomical joint constraints (parallel  
72 mechanism, coupling curves, ligament length variation, and elastic joint) were introduced,  
73 providing encouraging 3D kinematics as they allowed joint displacements (Bergamini et al.,  
74 2011; Duprey et al., 2010; Gasparutto et al., 2015; Richard et al., 2016). However, regardless  
75 of the joint constraints imposed, generic (unpersonalized) model-derived kinematics were  
76 shown inaccurate (knee kinematic error up to 17° and 8 mm) as these models could not adapt  
77 to patient-specific geometry, particularly in pathological conditions (Clément et al., 2017).

78 On the other hand, personalization of model geometry based on medical images was shown  
79 promising in improving joint kinematics accuracy (Assi et al., 2016; Clément et al., 2015;  
80 Nardini et al., 2020).

81 Joint simplification has indirect consequences on the predictive accuracy of both rigid  
82 body musculoskeletal (MSK) models, and Finite Element (FE) based MSK models. Studies  
83 that used FE-MSK models to predict local joint mechanics using *in vivo* joint kinematics (Shu  
84 et al., 2018; Xu et al., 2016) assumed the knee joint as 1 DoF. Such assumption might result  
85 in propagation of uncertainties on the predicted kinematics and would affect the joint reaction  
86 as well as muscle and ligament forces.

87 In light of the aforementioned contexts, reliable estimation of skeletal kinematics with  
88 SM-based motion data is still a major challenge (Richard et al., 2017). Furthermore,  
89 extensive time and complexity associated with customization of models to subjects' geometry  
90 prohibit large sample size. In that context, methods for 3D reconstruction of bony segments  
91 from medical imaging modalities, particularly biplanar X-ray imaging, are promising in  
92 research and clinical routine (Chaibi et al., 2012). Also, there is a need for adaptable  
93 modeling approaches that can account for subject-, task- and location-dependent STA.

94 In a previous study, a conceptual FE model was proposed for STA compensation  
95 (Skalli et al., 2018). The model consists of bone segments (pelvis, femur and tibia), skin  
96 markers, virtual markers, connecting elements between skin markers and corresponding  
97 bones, and joint models for the hip and the knee joint. The potential advantage of the  
98 proposed model is its versatility with regards to soft tissue stiffness personalization and  
99 alternative joint model representation. The objective of the current study was to develop the  
100 conceptual model for the lower limb and to implement it on healthy volunteers considering  
101 subject-specific models.

102

103

## 104 **2. Materials and methods**

105 First, the conceptual model is presented. Then implementation of the model is  
106 illustrated within an IRB approved (CEHDF285) study. Finally, the consistency and  
107 versatility of the model were investigated through sensitivity of various parameters, including  
108 the joints representation.

### 109 *2.1 Conceptual FE model of the lower limb*

110 The rationale underlying the conceptual model is twofold: First, the spring connecting  
111 the virtual marker and the skin marker is a simple way of modeling globally and grossly the  
112 soft tissue deformation, while being able to adjust the spring stiffness to differentiate both  
113 between anatomic regions (such as the pelvis, thigh and shank), and between populations of  
114 different skin types (tight or loose). Second, considering virtual markers just beneath the skin  
115 markers allows easy post-processing of the results to estimate the corrected position of skin  
116 markers. These corrected marker positions are analogous to the model determined markers in  
117 standard MBO approaches. Such post-processing helps to use the classical gait analysis  
118 software.

119 The conceptual model of the lower limb consists of bone segments, nodes  
120 representing skin markers and virtual markers, joint elements, and elements that connect the  
121 skin markers to the corresponding bones. Bone segments are represented by a set of high  
122 stiffness (quasi-rigid) beams. The joints between the segments are represented by rigid links,  
123 allowing free rotations at the joint and controlled displacements. The connection between a  
124 skin marker and the corresponding virtual marker is represented by a linear spring, where all  
125 the soft tissue deformation is reported. The connection between the virtual marker and the  
126 corresponding bone segment is established with high stiffness beams (Fig. 1).

127 The proposed model requires only the measured optoelectronic skin marker locations  
128 as imposed boundary conditions, without any need for additional force nor any further  
129 optimization process. The output of the Finite Element Analysis of the model is the  
130 mechanical response resulting in bone motion and the virtual marker positions. From the  
131 virtual marker positions, corrected marker positions are obtained.

132 Skin markers are denoted by  $S$ , differentiating between those of the pelvis ( $SP$ ), femur  
133 ( $SF$ ) and tibia ( $ST$ ). The number of markers for the pelvis ( $NMP$ ), femur ( $NMF$ ) and tibia  
134 ( $NMT$ ) is variable and depends on the protocol being considered. Each skin marker is  
135 therefore referred to using the corresponding subscript :  $SP_i$ ,  $SF_i$  and  $ST_i$  respectively for the  
136 pelvis ( $SP_1$  to  $SP_{NMP}$ ), femur ( $SF_1$  to  $SF_{NMF}$ ) and tibia ( $ST_1$  to  $ST_{NMT}$ ). Using the same  
137 convention, virtual markers are denoted  $SC$  ( $SCP_i$ ,  $SCF_i$  and  $SCT_i$  for the pelvis, femur and  
138 tibia respectively), and the bone points are denoted as  $B$  (differentiating between those of the  
139 pelvis ( $BP$ ), femur ( $BF$ ) and tibia ( $BT$ )). These bone points are different bone landmarks,  
140 automatically annotated in the 3D models (Chaibi et al., 2012), which serve as nodes for the  
141 FE model. As illustrated further in Fig. 2(a), the pelvis bone was represented by 6 nodes  
142 ( $BP_1$  to  $BP_6$ ), the femur by 7 nodes ( $BF_1$  to  $BF_7$ ), and the tibia by 6 nodes  
143 ( $BT_1$  to  $BT_6$ )(refer supplementary material for details). Beam elements with elastic modulus  
144 ( $E$ ) of 12 GPa (Choi et al., 1990) were used to connect the nodes for each bone segment. Hip  
145 and knee joints are denoted by HJ and KJ respectively.

#### 146 **Modeling of the skin marker-bone connection:**

147 Each pelvis skin marker ( $SP_1$  to  $SP_4$ ) was linked to the pelvis bone by a combination  
148 of spring element that connects the skin marker to the corresponding virtual marker  
149 ( $SCP_1$  to  $SCP_4$ ), and a beam element that connects the virtual marker to the bone. The springs  
150 were assigned with stiffness ( $k$ ) values in the range 5 kN/m to 65 kN/m (Dumas and  
151 Jacquelin, 2017; Gittoes et al., 2006; McLean et al., 2004), whereas the beams were

152 considered highly stiff and assigned the same elastic modulus as that of the bones. The same  
153 combination of elements was used to connect the skin markers to the femur and tibia bone  
154 segments.

155

## 156 **Modeling of the joints:**

157 As a first option, hip and knee joints were represented each by a rigid link allowing  
158 free rotation while controlling the relative displacements (through the length of the link). For  
159 the hip joint, the rigid link connected the acetabulum center and femur head center. For the  
160 knee joint, the rigid link was defined in the line joining the centroid of the two femoral  
161 condyle centers to the centroid of the two tibial plateau centers (Fig. 2(b)) (refer  
162 supplementary material for details).

### 163 *2.2. Model implementation*

#### 164 *2.2.1. Data Acquisition*

165 66 healthy volunteers were included (age range: 18-60 years; weight:  $71.3 \pm 15$  Kg;  
166 height:  $170 \pm 10$  cm) in this study. The only exclusion criterion was previous record of  
167 orthopedic surgery of the lower limbs.

168 Quantitative Movement Analysis was performed on an optoelectronic analysis system  
169 comprising 7 video-cameras (Vicon Motion System Ltd., Oxford Metrics, UK). The  
170 optoelectronic markers were positioned following the Plug-in Gait<sup>®</sup> method (Davis et al.,  
171 1991), and participants were asked to perform level walking at self-selected speed (Fig. 3(a)).  
172 Biplanar radiographs were then acquired using the EOS system (EOS Imaging, France). 3D  
173 digital models of bones were obtained using a 3D reconstruction algorithm validated by  
174 previous studies (Fig. 3(b)) (Chaibi et al., 2012). The location of skin markers was also  
175 computed from biplanar X-Rays.

#### 176 *2.2.2. Subject-specific FE model development and simulation*

177 From the 3D digital models of the bones, subject-specific anatomical landmarks were  
178 automatically identified, resulting in nodal coordinates of each bone, as represented in Fig.  
179 3(c). The distance between the skin and the corresponding virtual marker was arbitrarily  
180 chosen as 1 mm (i.e., spring length). A rigid link represented the hip and knee joints. The  
181 choice of the rigid link ( $L_k$ ) for the knee joint was motivated by the *in vitro* kinematic  
182 response obtained in a previous study on 12 cadaveric specimens showing that overall knee  
183 translations were nearly 20 mm (Rochcongar et al., 2016). For the hip ( $L_h$ ), the joint length  
184 was fixed to 1 mm based on an unpublished data on the hip joint translation quantified using  
185 biplanar X-rays. For simplicity, stiffness parameter of the springs was kept constant across all  
186 segments and assigned 50 kN/m.

187 The measured skin marker displacements at each frame from the motion capture were  
188 introduced to the model as a prescribed boundary condition. A solution was computed at each  
189 frame using commercial FE package ANSYS®, with a default Newton-Raphson algorithm,  
190 an implicit scheme widely used in numerical procedures for Partial Differential Equations  
191 (Bathe, 1996).

### 192 2.2.3. Kinematic computation

193 The positions of the resulting bone segments and virtual markers were used to define  
194 corrected markers ( $CF_i$ ) with the same consideration as those of the virtual markers, i.e., rigid  
195 links with the bone segment (Fig. 4). The positions of the corrected markers were used to  
196 compute STA Compensated (STAC) joint kinematics. Hip and knee joint rotational  
197 kinematics were expressed in the pelvis and femur anatomical reference frames (EOS-based)  
198 respectively, and with Cardan sequence  $YX'Z''$ . Hip joint translation was defined as the  
199 relative displacement between points  $A_c'$  and  $F_c'$  expressed in the pelvis anatomical reference  
200 frame. Similarly, knee joint translation was defined as a relative displacement between points  
201  $C_c'$  and  $T_c'$  expressed in the femur anatomical reference frame. Anatomical reference frames



202 were defined as described in (Schlatterer et al., 2009) for the femur and tibia, and in (Dubois,  
203 2014) for the pelvis (Fig. 4). A customized Matlab (MathWorks, Massachusetts, United  
204 States) routine was used for both SM-based and STAC kinematic processing. In each case,  
205 before and after STA compensation, joint kinematics were obtained using an internal  
206 procedure implemented in our previous studies (Azmy et al., 2010; Pillet et al., 2016;  
207 Rochcongar et al., 2016). Briefly, skin marker coordinate systems were registered on the  
208 bone anatomic reference frames to get the joint kinematics.

209 Joint kinematics (mean $\pm$ 1SD) for the hip and knee joint were plotted for all DoFs over  
210 time normalized gait cycle. The difference in range of motions (dROM) was also computed  
211 between SM-based and STAC kinematics.

## 212 *2.3. Illustration of versatility*

### 213 *2.3.1. Sensitivity of spring stiffness and joint length*

214 Two different stiffness values for the springs were implemented (5 kN/m and 65  
215 kN/m) to investigate the influence of stiffness parameters on joint kinematics.

216 Furthermore, two different knee joint lengths ( $L_k = 21$  mm and 31 mm) were  
217 arbitrarily considered to investigate the impact of joint lengths on estimated kinematics.  
218 Implemented knee joint lengths were based on the minimum and maximum value found in  
219 the population. In this case, spring stiffness was kept constant with a value of 65 kN/m.

220 Differences between the two groups with different spring stiffness values and then  
221 joint lengths were analyzed with a Student's *t*-test or Wilcoxon sign-rank test depending on  
222 the outcomes of the Shapiro-Wilk test of normality, using a customized Matlab routine. For  
223 all the tests, the significance level was set 0.05 *a priori*.

### 224 *2.3.2. Alternative joint representations*

225 Two other alternative joint models were considered to illustrate the versatility of the  
226 lower limb FE model.

227 These joint models were:

228 *Parallel Mechanism*: The centers of the medial and lateral condyles and corresponding tibial  
229 plateaus were considered to model the knee joint with two rigid links approximating the  
230 femur-tibia contact behavior. The hip joint model was left unaltered (single-link model).

231 *Spherical joint*: Spherical joint model at the hip and knee joint was considered. The joint  
232 constraint location was placed on the femur head center for the hip joint and the mid-point of  
233 the two femoral condyles for the knee joint. Such consideration was similar, as reported in  
234 previous studies (Sauret et al., 2016).

235 Differences between alternative joint models were analyzed with a Student's *t*-test or  
236 Wilcoxon sign-rank test depending on the outcomes of the Shapiro-Wilk test of normality,  
237 using a customized Matlab routine. For all the tests, the significance level was set 0.05 *a*  
238 *priori*. Spring stiffness value of 65 kN/m was assigned for all the joint models.

#### 239 *2.4. Model comparison with multi-body optimization*

240 As no reference kinematics (artifact-free motion) were available, the FE model results  
241 were compared to a standard MBO method with spherical joint modeling for both the hip and  
242 knee joints (Lu and O'Connor, 1999). The joint constraints and locations incorporated in the  
243 MBO were in accordance with the FE model. To compare the kinematic results of the  
244 subject-specific FE models with MBO, the same anatomical reference frames were defined  
245 for the MBO bone segments.

246 Differences between the two methods were analyzed with a Student's *t*-test or  
247 Wilcoxon sign-rank test depending on the outcomes of the Shapiro-Wilk test of normality,  
248 using a customized Matlab routine. For all the tests, the significance level was set 0.05 *a*  
249 *priori*.

### 250 **3. Results**

251 Each FE model with 5 DoF joints required less than 45 sec of run time on a single  
252 processor desktop PC to simulate a complete gait cycle of approximately 200–300 frames.  
253 All results are synthesized in Table 1.

### 254 *3.1. Joint kinematics*

255 Both rotational and translational kinematics estimated with skin marker measurements  
256 and FE model embedding the 5 DoF joint model are illustrated in Figs. 5 and 6 for the hip  
257 and knee joints respectively. The joint kinematics are plotted over time-normalized gait cycle.

258 Overall, for the hip joint, STAC and SM-based kinematics exhibited qualitatively  
259 similar pattern. However, differences in range of motion (dROM) varied across all DoFs,  
260 with a maximum value of  $-2.2^\circ$  for Abduction/Adduction (Abd/Add) followed by  $-1.6^\circ$  and  
261  $-0.3^\circ$  for Flexion/Extension (Flex/Ext) and Internal/External (Int/Ext) rotation respectively.  
262 Maximum joint displacement up to 1 mm was observed for STAC kinematics while showing  
263 up to 41.5 mm for SM-based kinematics in Posterior/Anterior (Post/Ant) direction. In the  
264 Medial/Lateral (Med/Lat) and Inferior/Superior (Inf/Sup) direction, joint displacement  
265 exhibited less than 1 mm, whereas SM-based kinematics showed up to 28 mm.

266 For the knee joint, maximum dROM value was observed for Int/Ext ( $12.5^\circ$ ) followed  
267 by Flex/Ext ( $-6.3^\circ$ ) and Abd/Add ( $1.5^\circ$ ) rotation respectively. A maximum of 20 mm of  
268 joint displacement was noted in (Post/Ant) direction, while remaining DoFs showed up to 9  
269 mm (Med/Lat) and 3 mm (Inf/Sup) for STAC kinematics. These results showed up to 30.5  
270 mm, 12.5 mm, and 21 mm respectively, for SM-based kinematics.

### 271 *3.2. Sensitivity study*

#### 272 *3.2.1. Spring stiffness parameter and joint length*

273 With two different values of spring stiffness parameters (5 kN/m and 65 kN/m), no  
274 statistical significance in dROM was noted for the hip joint kinematics. As for the knee joint,  
275 different spring stiffness revealed significant dROM for all DoFs except Flex/Ext.

276 With different knee joint lengths (21 mm and 31 mm), hip translational kinematics  
277 displayed significant variability for Lat/Med motions (by 2 mm), while showing less than 1  
278 mm change for remaining DoFs. As for knee translational kinematics, significant dROM was  
279 observed for the Post/Ant and Inf/Sup motions.

### 280 *3.2.2. Influence of alternative joint models on kinematics*

281 Different joint representations displayed varying kinematic changes across all DoFs  
282 for the hip and knee joints. Among hip joint kinematic results, significant dROM was  
283 observed only for the Lat/Med (up to 4 mm) and Post/Ant motion (up to 2.7 mm). Similarly,  
284 knee joint kinematics significantly varied up to 3.4° in dROM for Int/Ext rotation when joint  
285 model was altered, along with Post/Ant motion (up to 7.6 mm), for the single link Vs parallel  
286 mechanism.

### 287 *3.3. FE Model comparison with MBO*

288 Statistically significant differences between MBO-based and FE-based STA  
289 compensation for the hip and knee joints were found ( $p < 0.05$ ). Those differences, however,  
290 were always in the range of 0.7° to 2°.

## 291 **3. Discussion**

292 Soft Tissue Artifact compensation is essential for accurate estimation of *in vivo* joint  
293 kinematics in both research and clinical routine; however, personalization and versatility of  
294 current model-based methods still represent a challenge. The purpose of this study was to  
295 develop and evaluate a conceptual FE model of the lower limb for STA compensation. The  
296 proposed method was evaluated on a population of 66 subjects. This model is  
297 computationally fast (less than 45 sec run time), and its main advantage is versatility allowing  
298 a wide range of parameters and joint representations to be considered.

299 Qualitatively similar kinematic patterns were observed between SM-based and FE-  
300 based STA compensated (STAC) results for both the hip and knee joints, with differences in

301 range ROM across all DoFs. SM-based kinematics were comparable to the literature  
302 (D'Isidoro et al., 2020; Fiorentino et al., 2017). Results obtained showed that overall  
303 rotational ROM was underestimated by SM-based results up to  $2.2^\circ$  for the hip joint, thus  
304 confirming similar observations reported in studies that compared SM-based ROM to dual  
305 fluoroscopic measurements (Fiorentino et al., 2020). For the knee joint, SM-based ROM was  
306 smaller by  $6.3^\circ$  for the Flex/Ext, whereas other DoFs revealed up to  $12^\circ$  higher as compared  
307 to STAC kinematics. For translational kinematics of the knee joint, SM-based results were  
308 higher as compared to STAC kinematics. STAC knee kinematics were comparable to studies  
309 that reported either bone-pin-based or fluoroscopy-based kinematics (Benoit et al., 2006;  
310 Kozanek et al., 2009; Myers et al., 2012). Nevertheless, we observed overall higher dROM  
311 values between SM-based and STAC as compared to the studies that reported in the range  
312  $4.4^\circ$ – $5.3^\circ$  for rotational kinematics, and up to 13 mm for translational kinematics (Benoit et  
313 al., 2006; Leardini et al., 2005). These discrepancies may arise from the experimental  
314 protocol, such as number of markers, cluster configuration and location.

315       Sensitivity study showed that joint kinematics (particularly the knee joint) were  
316 sensitive to spring stiffness exhibiting dROM value up to  $1.5^\circ$  for the rotational kinematics  
317 and up to 3.5 mm for translational kinematics. Different joint representations revealed that  
318 alternative joint models have considerable influence on the estimated kinematics, particularly  
319 knee Int/Ext rotation (up to  $3.4^\circ$ ) and translations (up to 7.6 mm), establishing similar  
320 remarks as reported in the literature (Duprey et al., 2010; Richard et al., 2017).

321       Joint kinematics computed using the proposed FE-based STA compensation model  
322 were able to consider the joint simplifications used in a standard MBO method in the  
323 literature, producing consistent results. However, the proposed approach aims to overcome  
324 the limitations of the MBO method underlined by (Clément et al., 2017), who showed that  
325 simplified joint constraints (kinematic or anatomical) were inadequate for clinical

326 applications. Indeed, such simplifications considered in MBO methods may be sufficient for  
327 many movement analysis applications; however, this is not the case for pathological cases.  
328 For example, in a previously unpublished study using EOS imaging, the translations at the  
329 hip joint (distance between the femur head and acetabulum center) during a change of posture  
330 from standing to sitting was quantified varying up to 5 mm in pathological population. In  
331 such cases, it is apparent that standard joint representation, such as a spherical joint, is not  
332 relevant. The main advantage of the new procedure is its versatility. Indeed, it can be  
333 modified to incorporate more or less detailed joint representations to improve joint mechanics  
334 estimation. It could also evolve into subject-specific modeling for clinical applications. For  
335 example, the spring stiffness could be personalized based on quantitative soft tissue  
336 deformation that can be assessed using medical images (Südhoff et al., 2007). Such avenues  
337 are currently under investigation.

338         This study has some limitations. First, there was no reference kinematics to compare  
339 the results to. Therefore, the joint kinematics exhibited by the FE models were compared to  
340 those computed with the MBO method. Nevertheless, as we cannot consider MBO as a fully  
341 reliable solution for STA compensation (Richard et al., 2017), such comparison is only for  
342 assessing the qualitative performance of the FE model. Second, STA parameters  
343 implemented in the model were arbitrary as there is a lack of data in the literature.  
344 Personalization of such parameters is, however, essential to encompass different range of  
345 subjects (young, adult, patients with CP and OA etc.). Third, joint representation in this  
346 model is still simplified, which could be insufficient for investigating local joint mechanics  
347 for healthy or pathological joints (Adouni et al., 2012; Lenhart et al., 2015; Shu et al., 2018;  
348 Valente et al., 2014). Nevertheless, as a preliminary step, the current contribution only  
349 focused on exploring and facilitating personalization of the parameters that are important for  
350 STA compensation. Moreover, even with simplified joint representation, the model could

351 limit the effect of STA in joint kinematics. Fourth, although the proposed approach may give  
352 the impression that it complicates the process of STA compensation in gait analysis, the  
353 perspectives are numerous, as already highlighted. Fifth, no external forces nor inertial/mass  
354 forces were imposed on the model. The only boundary conditions were the external skin  
355 markers displacements. Considering the inertial/mass forces would be necessary when  
356 dynamic phenomena are essential to take into account, for example, in sports biomechanics.  
357 Finally, the study was based on a single motor task, i.e., level walking. Therefore, the results  
358 may vary with other motor tasks (hopping, cutting, stand-to-sit) and hence the interpretations.

359         The proposed approach may serve in two major fields of applications: First, in gait  
360 analysis for research, where classical scaling techniques are used to obtain subject-specific  
361 geometry instead of image-based model personalization. Compensating for STA with such  
362 method is possible with an approximated model geometry, while being able to differentiate  
363 soft tissue stiffness parameters between different sub-groups. To be noted that as such scaling  
364 techniques often consider gross anthropometry of the subject and disregards distinctive  
365 features of the joint, therefore can be considered “not actually personalized” (Nardini et al.,  
366 2020; Smale et al., 2019). Second field of application can be clinical gait analysis, where  
367 image-based model personalization could capture anatomical details of the joint structures.

368         In conclusion, as a first study, we presented a conceptual FE model of the lower limb  
369 for STA compensation and evaluated it in a population of 66 subjects with varying  
370 morphologies. The model appeared to be satisfactory in compensating for STA and versatile,  
371 facilitating parameters necessary for model personalization. The methodology developed and  
372 evaluated in this study may improve the accuracy of kinematic predictions, which is  
373 instrumental for MSK models as well as making clinical decisions. In the current  
374 contribution, the human model used for the computations consists only of the lower limbs  
375 (pelvis, femur and tibia). However, the same approach can be considered for the whole body,

376 which could be particularly interesting for the shoulder joint (Duprey et al., 2017). Future  
377 work could focus on further model evaluation based on *in vivo* data, such as dual  
378 fluoroscopy.

### 379 **Conflict of Interest**

380 None

### 381 **Acknowledgments**

382 The authors are deeply grateful to the ParisTech BiomecAM chair program on subject-  
383 specific musculoskeletal modeling for financial support.

### 384 **References**

- 385  
386 Adouni, M., Shirazi-Adl, A., Shirazi, R., 2012. Computational biodynamics of human knee joint in  
387 gait: From muscle forces to cartilage stresses. *J Biomech* 45, 2149–2156.  
388 <https://doi.org/10.1016/j.jbiomech.2012.05.040>
- 389 Akbarshahi, M., Schache, A.G., Fernandez, J.W., Baker, R., Banks, S., Pandy, M.G., 2010. Non-  
390 invasive assessment of soft-tissue artifact and its effect on knee joint kinematics during  
391 functional activity. *J Biomech* 43, 1292–1301. <https://doi.org/10.1016/j.jbiomech.2010.01.002>
- 392 Andriacchi, T.P., Alexander, E.J., 2000. Studies of human locomotion: Past, present and future. *J*  
393 *Biomech* 33, 1217–1224. [https://doi.org/10.1016/S0021-9290\(00\)00061-0](https://doi.org/10.1016/S0021-9290(00)00061-0)
- 394 Andriacchi, T.P., Alexander, E.J., Toney, M.K., Dyrby, C., Sum, J., 1998. A Point Cluster Method for  
395 In Vivo Motion Analysis: Applied to a Study of Knee Kinematics. *J Biomech Eng* 120, 743–  
396 749. <https://doi.org/10.1115/1.2834888>
- 397 Assi, A., Sauret, C., Massaad, A., Bakouny, Z., Pillet, H., Skalli, W., Ghanem, I., 2016. Validation of  
398 hip joint center localization methods during gait analysis using 3D EOS imaging in typically  
399 developing and cerebral palsy children. *Gait Posture* 48, 30–35.  
400 <https://doi.org/10.1016/j.gaitpost.2016.04.028>
- 401 Azmy, C., Guérard, S., Bonnet, X., Gabrielli, F., Skalli, W., 2010. EOS® orthopaedic imaging system  
402 to study patellofemoral kinematics: Assessment of uncertainty. *Orthop Traumatol Surg Res* 96,  
403 28–36. <https://doi.org/10.1016/j.otsr.2009.10.013>
- 404 Bathe, K.J., 1996. *Finite Element Procedures*, Englewood Cliffs New Jersey.
- 405 Benoit, D.L., Ramsey, D.K., Lamontagne, M., Xu, L., Wretenberg, P., Renström, P., 2006. Effect of  
406 skin movement artifact on knee kinematics during gait and cutting motions measured in vivo.  
407 *Gait Posture* 24, 152–164. <https://doi.org/10.1016/j.gaitpost.2005.04.012>
- 408 Bergamini, E., Pillet, H., Hausselle, J., Thoreux, P., Guerard, S., Camomilla, V., Cappozzo, A., Skalli,  
409 W., 2011. Tibio-femoral joint constraints for bone pose estimation during movement using  
410 multi-body optimization. *Gait Posture* 33, 706–711.  
411 <https://doi.org/10.1016/j.gaitpost.2011.03.006>
- 412 Cappello, A., Cappozzo, A., La Palombara, P.F., Lucchetti, L., Leardini, A., 1997. Multiple  
413 anatomical landmark calibration for optimal bone pose estimation. *Hum Mov Sci* 16, 259–274.  
414 [https://doi.org/https://doi.org/10.1016/S0167-9457\(96\)00055-3](https://doi.org/https://doi.org/10.1016/S0167-9457(96)00055-3)
- 415 Chaïbi, Y., Cresson, T., Aubert, B., Hausselle, J., Neyret, P., Hauger, O., de Guise, J.A., Skalli, W.,  
416 2012. Fast 3D reconstruction of the lower limb using a parametric model and statistical  
417 inferences and clinical measurements calculation from biplanar X-rays. *Comput Methods*  
418 *Biomech Biomed Engin* 15, 457–466. <https://doi.org/10.1080/10255842.2010.540758>



- 419 Charlton, I.W., Tate, P., Smyth, P., Roren, L., 2004. Repeatability of an optimised lower body model.  
420 *Gait Posture* 20, 213–221. <https://doi.org/10.1016/j.gaitpost.2003.09.004>
- 421 Chèze, L., Fregly, B.J., Dimnet, J., Sztankóová, Z., Kyselová, J., Rychtářová, J., Czerneková, V.,  
422 1995. A solidification procedure to facilitate kinematic analyses based on video system data. *J*  
423 *Biomech* 28, 879–884. [https://doi.org/https://doi.org/10.1016/0021-9290\(95\)95278-D](https://doi.org/https://doi.org/10.1016/0021-9290(95)95278-D)
- 424 Clément, J., Dumas, R., Hagemester, N., de Guise, J.A., 2017. Can generic knee joint models  
425 improve the measurement of osteoarthritic knee kinematics during squatting activity? *Comput*  
426 *Methods Biomech Biomed Engin* 20, 94–103. <https://doi.org/10.1080/10255842.2016.1202935>
- 427 Clément, J., Dumas, R., Hagemester, N., de Guise, J.A., 2015. Soft tissue artifact compensation in  
428 knee kinematics by multi-body optimization: Performance of subject-specific knee joint models.  
429 *J Biomech* 48, 3796–3802. <https://doi.org/10.1016/j.jbiomech.2015.09.040>
- 430 D’Isidoro, F., Brockmann, C., Ferguson, S.J., 2020. Effects of the soft tissue artefact on the hip joint  
431 kinematics during unrestricted activities of daily living. *J Biomech* 109717.  
432 <https://doi.org/10.1016/j.jbiomech.2020.109717>
- 433 Davis, R.B., Öunpuu, S., Tyburski, D., 1991. A gait analysis data collection and reduction technique.  
434 *Hum Mov Sci* 10, 575–587. [https://doi.org/https://doi.org/10.1016/0167-9457\(91\)90046-Z](https://doi.org/https://doi.org/10.1016/0167-9457(91)90046-Z)
- 435 Dubois, G., 2014. Contribution à la modélisation musculo-squelettique personnalisée du membre  
436 inférieur combinant stéréoradiographie et ultrason.
- 437 Dumas, R., Jacquelin, E., 2017. Stiffness of a wobbling mass models analysed by a smooth  
438 orthogonal decomposition of the skin movement relative to the underlying bone. *J Biomech* 62,  
439 47–52. <https://doi.org/10.1016/j.jbiomech.2017.06.002>
- 440 Duprey, S., Cheze, L., Dumas, R., 2010. Influence of joint constraints on lower limb kinematics  
441 estimation from skin markers using global optimization. *J Biomech* 43, 2858–2862.  
442 <https://doi.org/10.1016/j.jbiomech.2010.06.010>
- 443 Duprey, S., Naaim, A., Moissenet, F., Begon, M., Chèze, L., 2017. Kinematic models of the upper  
444 limb joints for multibody kinematics optimisation: An overview. *J Biomech* 62, 87–94.  
445 <https://doi.org/10.1016/j.jbiomech.2016.12.005>
- 446 Fiorentino, N.M., Atkins, P.R., Kutschke, M.J., Bo Foreman, K., Anderson, A.E., 2020. Soft Tissue  
447 Artifact Causes Underestimation of Hip Joint Kinematics and Kinetics in a Rigid-Body  
448 Musculoskeletal Model. *J Biomech* 108, 109890.  
449 <https://doi.org/10.1016/j.jbiomech.2020.109890>
- 450 Fiorentino, N.M., Atkins, P.R., Kutschke, M.J., Goebel, J.M., Foreman, K.B., Anderson, A.E., 2017.  
451 Soft tissue artifact causes significant errors in the calculation of joint angles and range of motion  
452 at the hip. *Gait Posture* 55, 184–190. <https://doi.org/10.1016/j.gaitpost.2017.03.033>
- 453 Gasparutto, X., Sancisi, N., Jacquelin, E., Parenti-Castelli, V., Dumas, R., 2015. Validation of a multi-  
454 body optimization with knee kinematic models including ligament constraints. *J Biomech* 48,  
455 1141–1146. <https://doi.org/10.1016/j.jbiomech.2015.01.010>
- 456 Gittoes, M.J.R., Brewin, M.A., Kerwin, D.G., 2006. Soft tissue contributions to impact forces  
457 simulated using a four-segment wobbling mass model of forefoot – heel landings 25, 775–787.  
458 <https://doi.org/10.1016/j.humov.2006.04.003>
- 459 Kozanek, M., Hosseini, A., Liu, F., Van de Velde, S.K., Gill, T.J., Rubash, H.E., Li, G., 2009.  
460 Tibiofemoral kinematics and condylar motion during the stance phase of gait. *J Biomech* 42,  
461 1877–1884. <https://doi.org/10.1016/j.jbiomech.2009.05.003>
- 462 Leardini, A., Belvedere, C., Nardini, F., Sancisi, N., Conconi, M., Parenti-Castelli, V., 2017.  
463 Kinematic models of lower limb joints for musculo-skeletal modelling and optimization in gait  
464 analysis. *J Biomech* 62, 77–86. <https://doi.org/10.1016/j.jbiomech.2017.04.029>
- 465 Leardini, A., Chiari, A., Della Croce, U., Cappozzo, A., 2005. Human movement analysis using  
466 stereophotogrammetry Part 3. Soft tissue artifact assessment and compensation. *Gait Posture* 21,  
467 212–225. <https://doi.org/10.1016/j.gaitpost.2004.05.002>
- 468 Lenhart, R.L., Kaiser, J., Smith, C.R., Thelen, D.G., 2015. Prediction and Validation of Load-  
469 Dependent Behavior of the Tibiofemoral and Patellofemoral Joints During Movement. *Ann*  
470 *Biomed Eng* 43, 2675–2685. <https://doi.org/10.1007/s10439-015-1326-3>
- 471 Lu, T.W., O’Connor, J.J., 1999. Bone position estimation from skin marker co-ordinates using global  
472 optimisation with joint constraints. *J Biomech* 32, 129–134. [https://doi.org/10.1016/S0021-9290\(98\)00158-4](https://doi.org/10.1016/S0021-9290(98)00158-4)
- 473

- 474 McLean, S.G., Su, A., van den Bogert, A.J., 2004. Development and Validation of a 3-D Model to  
475 Predict Knee Joint Loading During Dynamic Movement . *J Biomech Eng* 125, 864–874.  
476 <https://doi.org/10.1115/1.1634282>
- 477 Myers, C.A., Torry, M.R., Shelburne, K.B., Giphart, J.E., Laprade, R.F., Woo, S.L.Y., Steadman,  
478 J.R., 2012. In vivo tibiofemoral kinematics during 4 functional tasks of increasing demand using  
479 biplane fluoroscopy. *Am J Sports Med* 40, 170–178. <https://doi.org/10.1177/0363546511423746>
- 480 Nardini, F., Belvedere, C., Sancisi, N., Conconi, M., Leardini, A., Durante, S., Parenti-Castelli, V.,  
481 2020. An anatomical-based subject-specific model of in-vivo knee joint 3D kinematics from  
482 medical imaging. *Appl Sci* 10, 8–12. <https://doi.org/10.3390/app10062100>
- 483 Pillet, H., Bergamini, E., Rochcongar, G., Camomilla, V., Thoreux, P., Rouch, P., Cappozzo, A.,  
484 Skalli, W., 2016. Femur, tibia and fibula bone templates to estimate subject-specific knee  
485 ligament attachment site locations. *J Biomech* 49, 3523–3528.  
486 <https://doi.org/10.1016/j.jbiomech.2016.09.027>
- 487 Reinbolt, J.A., Schutte, J.F., Fregly, B.J., Koh, B. II, Haftka, R.T., George, A.D., Mitchell, K.H.,  
488 2005. Determination of patient-specific multi-joint kinematic models through two-level  
489 optimization. *J Biomech* 38, 621–626. <https://doi.org/10.1016/j.jbiomech.2004.03.031>
- 490 Richard, V., Cappozzo, A., Dumas, R., 2017. Comparative assessment of knee joint models used in  
491 multi-body kinematics optimisation for soft tissue artefact compensation. *J Biomech* 62, 95–101.  
492 <https://doi.org/10.1016/j.jbiomech.2017.01.030>
- 493 Richard, V., Lamberto, G., Lu, T.W., Cappozzo, A., Dumas, R., 2016. Knee Kinematics Estimation  
494 Using Multi-Body Optimisation Embedding a Knee Joint Stiffness Matrix: A Feasibility Study.  
495 *PLoS One* 11, 1–18. <https://doi.org/10.1371/journal.pone.0157010>
- 496 Rochcongar, G., Pillet, H., Bergamini, E., Moreau, S., Thoreux, P., Skalli, W., Rouch, P., 2016. A  
497 new method for the evaluation of the end-to-end distance of the knee ligaments and popliteal  
498 complex during passive knee flexion. *Knee* 23, 420–425.  
499 <https://doi.org/10.1016/j.knee.2016.02.003>
- 500 Sauret, C., Pillet, H., Skalli, W., Sangeux, M., 2016. On the use of knee functional calibration to  
501 determine the medio-lateral axis of the femur in gait analysis: Comparison with EOS biplanar  
502 radiographs as reference. *Gait Posture* 50, 180–184.  
503 <https://doi.org/10.1016/j.gaitpost.2016.09.008>
- 504 Schlatterer, B., Suedhoff, I., Bonnet, X., Catonne, Y., Maestro, M., Skalli, W., 2009. Skeletal  
505 landmarks for TKR implantations: Evaluation of their accuracy using EOS imaging acquisition  
506 system. *Orthop Traumatol Surg Res* 95, 2–11. <https://doi.org/10.1016/j.otsr.2008.05.001>
- 507 Seffinger, M.A., Hruba, R.J., 2007. CHAPTER 3 - Manual Diagnostic Procedures Overview, in:  
508 Seffinger, M.A., Hruba, R.J.B.T.-E.-B.M.M. (Eds.), . W.B. Saunders, Philadelphia, pp. 35–58.  
509 <https://doi.org/https://doi.org/10.1016/B978-1-4160-2384-5.50007-9>
- 510 Shu, L., Yamamoto, K., Yao, J., Saraswat, P., Liu, Y., Mitsuishi, M., Sugita, N., 2018. A subject-  
511 specific finite element musculoskeletal framework for mechanics analysis of a total knee  
512 replacement. *J Biomech* 77, 146–154. <https://doi.org/10.1016/j.jbiomech.2018.07.008>
- 513
- 514 Skalli, W., Hermal, T., Bonnet, X., Assi, A., Pillet, H., 2018. A subject-specific finite element based  
515 method for soft tissue artefact reduction in motion analysis. In: 8th World Congress of  
516 Biomechanics. URL: [https://app.oxfordabstracts.com/events/123/program-](https://app.oxfordabstracts.com/events/123/program-app/submission/24056)  
517 [app/submission/24056](https://app.oxfordabstracts.com/events/123/program-app/submission/24056)
- 518 Smale, K.B., Conconi, M., Sancisi, N., Krogsgaard, M., Alkjaer, T., Parenti-Castelli, V., Benoit, D.L.,  
519 2019. Effect of implementing magnetic resonance imaging for patient-specific OpenSim models  
520 on lower-body kinematics and knee ligament lengths. *J Biomech* 83, 9–15.  
521 <https://doi.org/10.1016/j.jbiomech.2018.11.016>
- 522 Südhoff, I., Van Driessche, S., Laporte, S., de Guise, J.A., Skalli, W., 2007. Comparing three  
523 attachment systems used to determine knee kinematics during gait. *Gait Posture* 25, 533–543.  
524 <https://doi.org/10.1016/j.gaitpost.2006.06.002>
- 525 Valente, G., Pitto, L., Testi, D., Seth, A., Delp, S.L., Stagni, R., Viceconti, M., Taddei, F., 2014. Are  
526 subject-specific musculoskeletal models robust to the uncertainties in parameter identification?  
527 *PLoS One* 9. <https://doi.org/10.1371/journal.pone.0112625>
- 528 Xu, C., Silder, A., Zhang, J., Hughes, J., Unnikrishnan, G., Reifman, J., Rakesh, V., 2016. An

529 Integrated Musculoskeletal-Finite-Element Model to Evaluate Effects of Load Carriage on the  
530 Tibia during Walking. J Biomech Eng 138, 101001. <https://doi.org/10.1115/1.4034216>  
531

## 1 **Figure Captions**

2

3 **Figure 1.** Schematic illustration of the conceptual lower limb FE model. Detailed illustration shown  
4 only for the femur segment.  $BP_i$ ,  $BF_i$  and  $BT_i$  denote pelvis, femur and tibia bone nodes.  $SF_i$  and  $SCF_i$   
5 are the skin and virtual markers respectively of the for the femur segment. HJ and KJ denote the hip  
6 and knee joint respectively.

7 **Figure 2.** (a) Detailed representation of the lower limb FE model with generic anatomical bony  
8 landmarks. Anatomical landmarks for the pelvis ( $BP_1$  to  $BP_6$ ): right antero-superior iliac spine, right  
9 postero-superior iliac spine, left antero-superior iliac spine, left postero-superior iliac spine, and right  
10 and left acetabulum centers. For the femur ( $BF_1$  to  $BF_7$ ): femur head center, greater trochanter, two  
11 diaphyseal points, medial and lateral condyle centers and center of the two condyles. For the tibia  
12 ( $BT_1$  to  $BT_6$ ): center of the two plateaus, two diaphyseal points, medial and lateral malleoli and center  
13 of the two malleoli. (b) joint modeling of the hip ( $L_H$ ) and knee joint ( $L_K$ ) with rigid links allowing  
14 free rotation and controlled relative displacement.

15 **Figure 3.** Schematic illustration of FE model personalization (a) the locations of the skin markers  
16 throughout gait cycle obtained from motion capture and (b) 3D digital models of the pelvis, femur  
17 and tibia built from two orthogonal radiographs (c) anatomical landmarks were identified from the 3D  
18 digital models resulting the nodal coordinates of each bone.

19 **Figure 4.** Illustration of corrected markers ( $CF_i, CP_i, CT_i$ ) and anatomical reference frames  
20 ( $R_{fem}, R_{pel}, R_{tib}$ ) for the (A) femur, (B) pelvis and (C) tibia respectively. Corrected markers are  
21 obtained from the virtual marker in a direction orthogonal to the bone segment and 1mm away from  
22 virtual marker. Anatomical reference frames for the femur and tibia were defined as described in  
23 (Schlatterer et al., 2009) and for pelvis (Dubois, 2014).

24 **Figure 5.** Hip joint kinematics during gait presented as Mean $\pm$ 1SD. Mean values for skin marker-  
25 based (green) and FE model predicted results (blue) are shown as solid lines, while standard deviation  
26 in lighter shades. Differences in ROM (dROM) between SM-based and STAC results are depicted as  
27 insets for all DoFs

28 **Figure 6.** Knee joint kinematics during gait presented as Mean $\pm$ 1SD. Mean values for skin marker-  
29 based (green) and FE model predicted results (blue) are shown as solid lines, while standard deviation  
30 in lighter shades. Differences in ROM (dROM) between SM-based and STAC results are depicted as  
31 insets for all DoFs.

32

33

34

35

36

37

38

39

40

41 **Figure 1.**

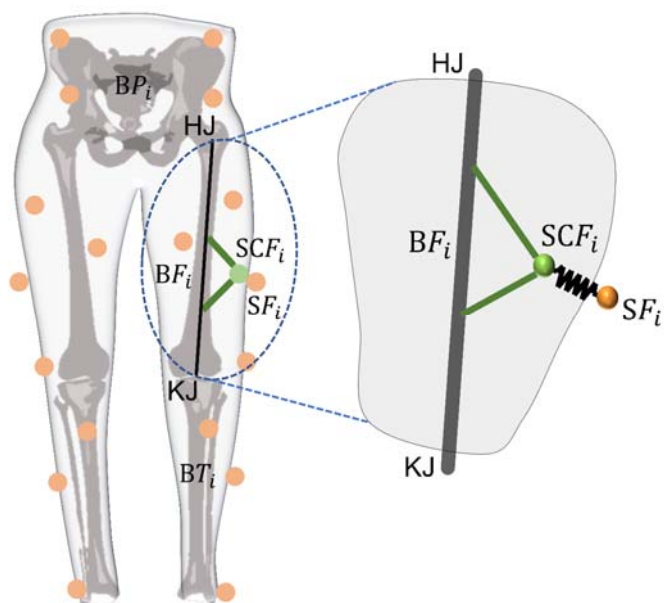

42

43 **Figure 2.**

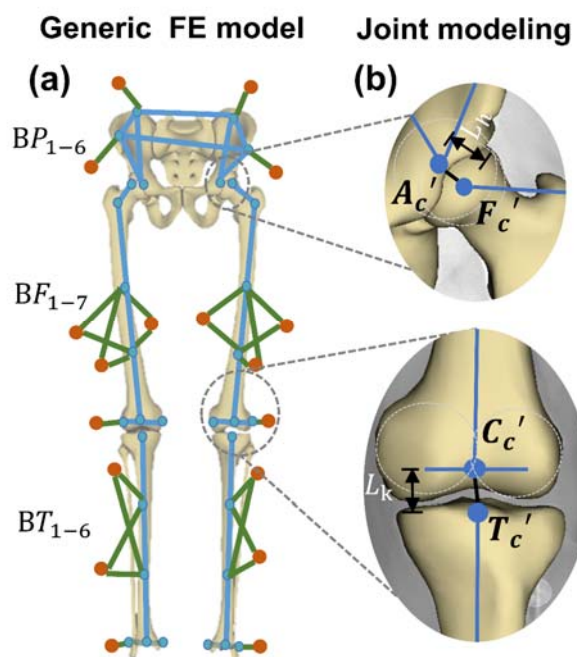

44

45

46 **Figure 3.**

47

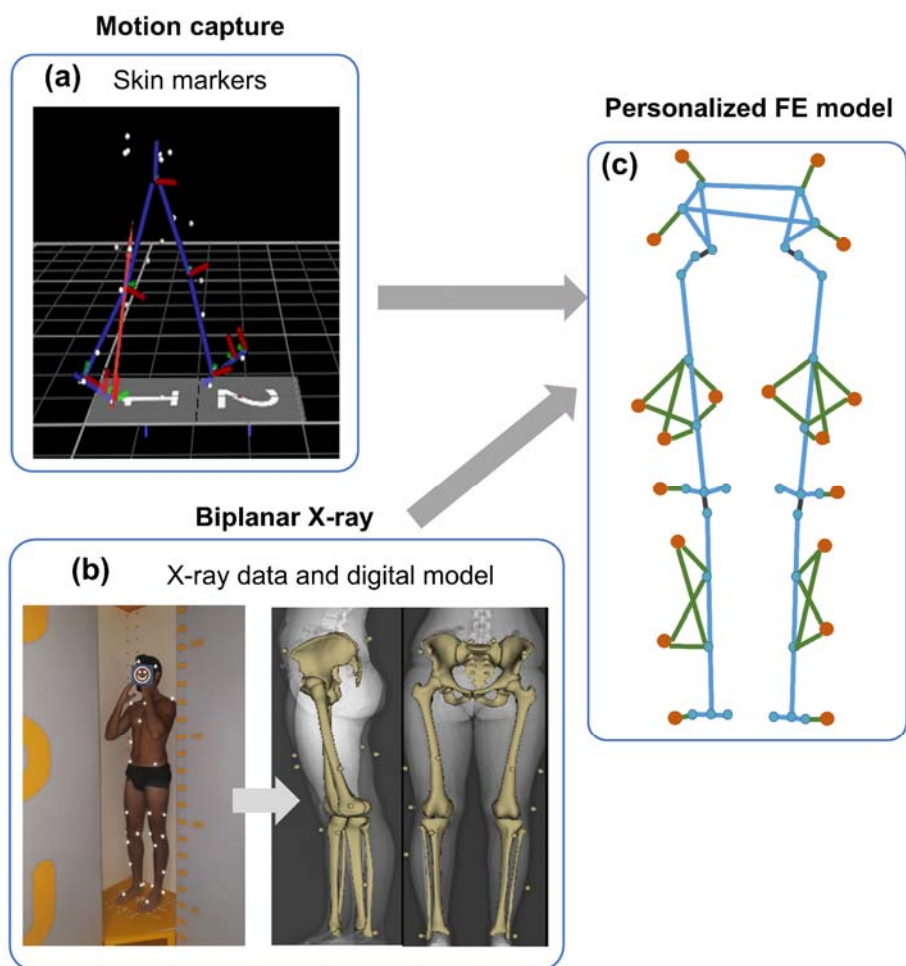

48

49

50

51

52

53

54

55

56

57 **Figure 4.**

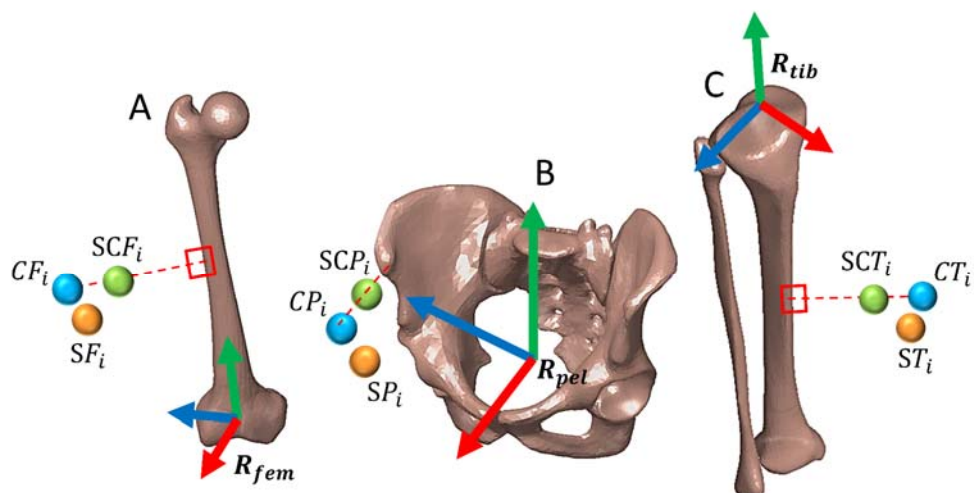

58

59 **Figure 5.**

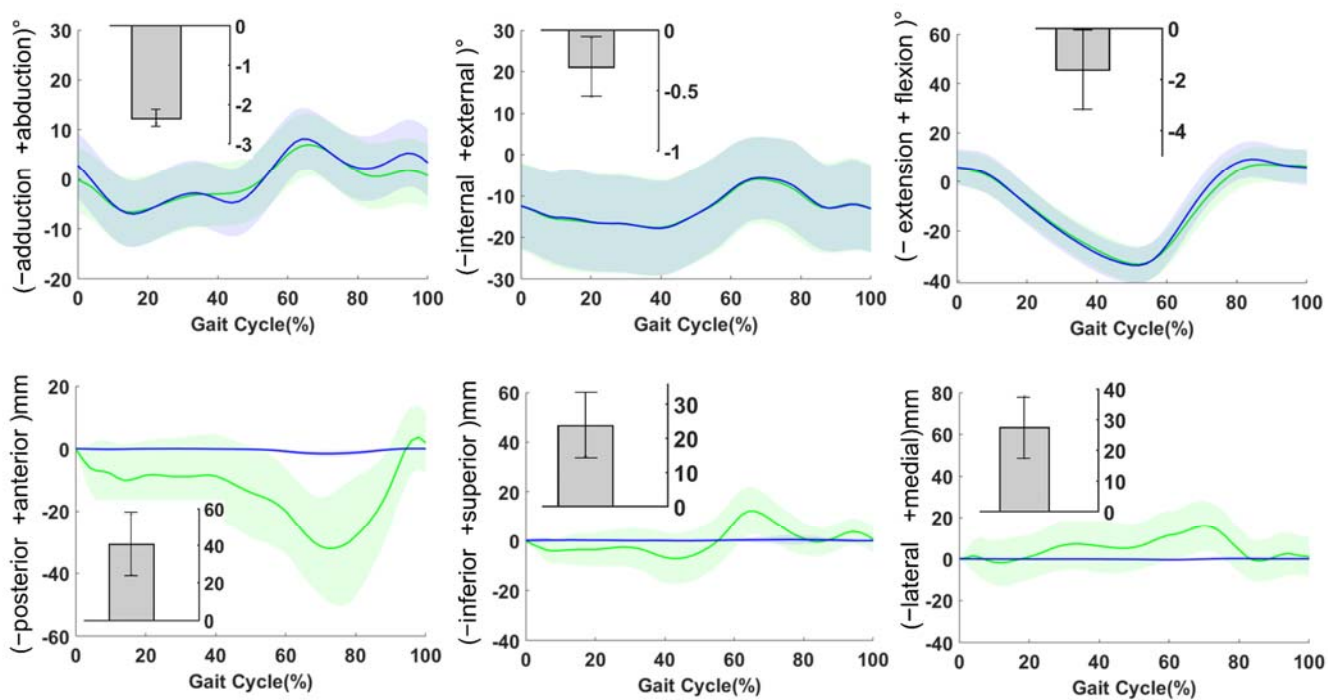

60

61

62

63 **Figure 6.**

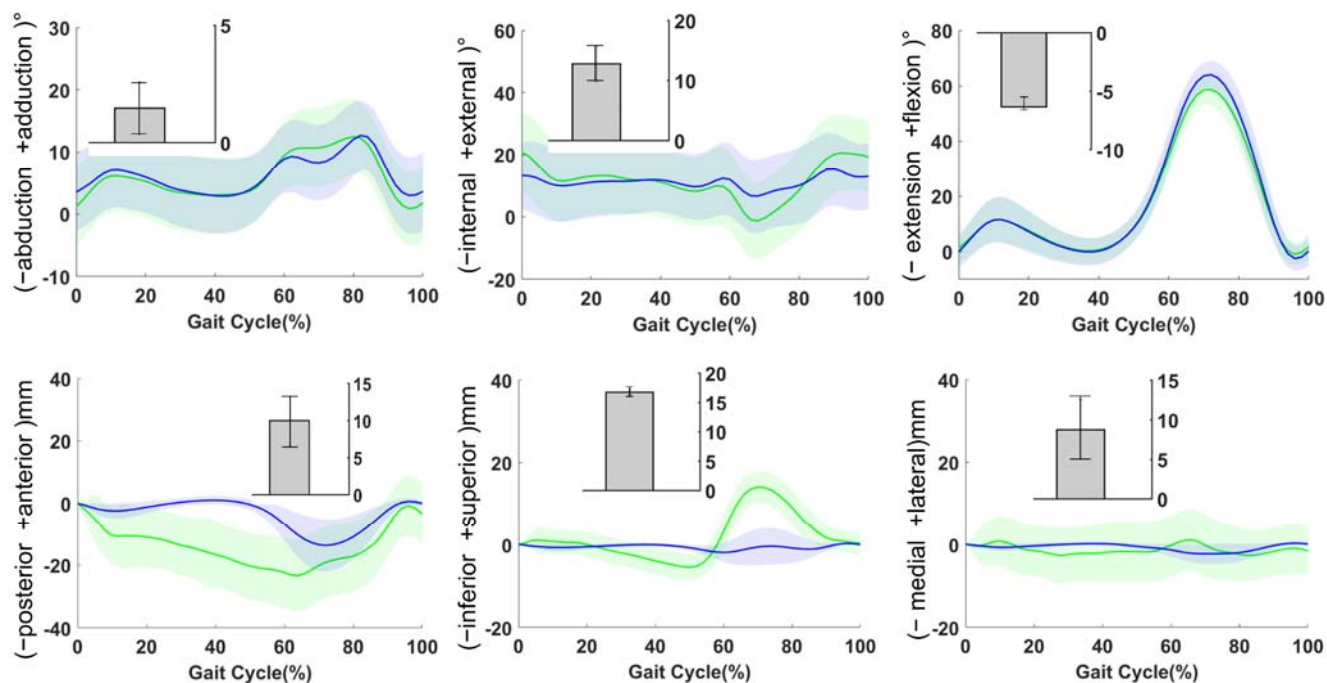

64
